# Supplementary material for: Childhood Epilepsy with Centrotemporal Spikes: Clinical and Neuropsychological Outcomes 5 Years after Remission
Source: Diagnostics (Basel). 2020 Nov 10;10(11):931. doi: 10.3390/diagnostics10110931 (PMC7696372; doi:10.3390/diagnostics10110931)
Supplement: Supplementary file 1 [file diagnostics-10-00931-s001.xlsx]

## Sheet: Table S1
ID	Sex	Epilepsy Family History	Pre Perinatal Insult	Motor Delay	Language Delay	Sleep Disorder	Educational Level	Socio-Economical Level	Seizures (Total Number)	Seizure Type	Seizure Frequency	Sleep IEDs Activation	AED	AEDs	Neuropsychological Diagnosis	Neuropsychologica Impairment
														Duration (Years)
1	F	N	NA	NA	NA	NA	NA	NA	NA	NA	NA	No	VPA	5	NA
2	F	N	NA	NA	NA	NA	NA	NA	3	focal motor	NA	Focal	NONE		NA
3	M	N	NA	N	NA	N	NA	NA	NA	NA	NA	No	VPA	NA	NA
4	F	N	NA	NA	NA	NA	NA	NA	2	focal with impaired awareness	NA	No	OXC	3	NA
5	F	N	NA	NA	NA	NA	NA	NA	2	focal motor	six-monthly	focal	NA	3	NA
6	F	N	NA	NA	NA	NA	NA	NA	2	focal motor	annual	No	VPA	4	NA
7	M	N	NA	NA	NA	NA	NA	NA	4	focal with impaired awareness	NA	No	NA		NA
8	M	N	NA	NA	NA	NA	NA	NA	2	focal with impaired awareness	annual	bilateral	VPA	2	NA
9	M	N	NA	NA	NA	NA	NA	NA	NA	NA	NA	NA	NA		NA
10	M	N	NA	NA	NA	NA	NA	NA	NA	NA	NA	NA	NA		NA
11	M	N	NA	NA	NA	NA	NA	NA	NA	NA	NA	NA	NA		NA
12	M	N	NA	NA	NA	NA	NA	NA	5	focal motor	monthly	focal	NONE		NA
13	M	N	NA	NA	NA	NA	NA	NA	NA	NA	NA	NA	NA		NA
14	M	Y	N	N	N	N	NA	NA	3	focal with impaired awareness	monthly	No	NONE		NA
15	F	N	NA	NA	NA	NA	NA	NA	3	focal to bilateral tonic–clonic	six-monthly	focal	NONE		NA
16	M	N	NA	NA	NA	NA	NA	NA	NA	NA	NA	No	NA		NA
17	F	N	NA	NA	NA	NA	NA	NA	5	focal with impaired awareness	six-monthly	focal	VPA	5	NA
18	M	N	NA	NA	NA	NA	NA	NA	NA	NA	NA	NA	NA		NA
19	M	Y	NA	NA	NA	NA	NA	NA	10	focal motor	monthly	bilateral	NONE		NA
20	F	N	N	N	N	N	NA	NA	8	focal motor	six-monthly	No	NONE		NA
21	M	N	NA	NA	NA	NA	NA	NA	1	NA	NA	bilateral	NA	2	NA
22	F	N	NA	NA	NA	NA	NA	NA	6	focal motor	six-monthly	focal	CLB	2	NA
23	M	Y	N	N	N	N	NA	NA	2	focal motor	six-monthly	focal	NONE		NA
24	M	N	NA	NA	NA	NA	NA	NA	2	focal motor	annual	focal	NONE		NA
25	F	N	N	N	N	N	middle	low	2	focal motor	annual	bilateral	NONE		NA
26	M	Y	N	N	N	N	high	low	5	focal motor	six-monthly	focal	NONE		NA
27	F	N	N	N	N	Y	NA	middle	10	focal motor	six-monthly	No	NONE		NA
28	F	N	N	N	N	Y	NA	high	20	focal with impaired awareness	NA	focal	CBZ	NA	NA
29	F	N	N	N	N	N	middle	middle	4	focal motor	six-monthly	focal	NONE		NA
30	F	N	N	N	N	N	high	high	6	focal to bilateral tonic–clonic	monthly	bilateral	VPA, CLB	3	NA
31	M	N	N	N	N	N	high	middle	4	focal motor	annual	focal	CBZ	3	NA
32	M	N	N	N	N	N	high	middle	NA	NA	NA	NA	NA		NA
33	F	Y	N	N	N	N	high	high	15	focal motor	monthly	focal	VPA	3	NA
34	M	N	Y preterm	N	N	Y	high	high	4	focal motor	six-monthly	focal	NONE		NA
35	M	N	N	N	Y	N	middle	middle	10	focal motor	monthly	focal	OXC	9	NA
36	F	N	N	N	N	N	high	low	8	focal to bilateral tonic–clonic	monthly	focal	NONE		NA
37	M	N	N	N	N	N	high	middle	10	focal motor	monthly	focal	CLB	4	NA
38	M	N	Y preterm	N	N	N	high	middle	10	focal motor	six-monthly	focal	CLB	3	NA
39	M	N	Y preterm	N	N	N	high	middle	10	focal motor	six-monthly	No	CLB	3	NA
40	M	N	N	N	N	N	high	middle	2	focal with impaired awareness	annual	focal	VPA	6	NA
41	M	N	N	N	N	N	high	middle	8	focal with impaired awareness	six-monthly	No	CLB	2	NA
42	M	N	N	N	N	N	high	middle	2	focal motor	annual	Focale	NONE		NA
43	F	N	N	N	N	Y	high	high	1	focal with impaired awareness	annual	focal	NONE		NA
44	M	N	N	N	N	N	high	high	5	focal motor	annual	No	NONE		NA
45	F	N	N	N	N	N	high	middle	10	focal motor	daily	bilateral	VPA, TPM	11	NA
46	M	N	N	N	N	N	high	high	10	focal motor	six-monthly	focal	CLB	5	NA
47	M	N	N	N	N	N	high	high	20	focal motor	monthly	focal	NONE		NA
48	F	N	N	N	N	N	high	middle	1	focal with impaired awareness	NA	No	VPA	2	NONE
49	M	N	N	N	N	N	high	middle	4	focal motor	monthly	focal	NONE		NONE
50	F	N	N	N	N	N	high	middle	7	focal to bilateral tonic–clonic	six-monthly	bilateral	VPA, TPM, CLB	6	NONE
51	M	N	N	N	N	N	high	middle	3	focal with impaired awareness	monthly	bilateral	OXC	4	NONE
52	M	N	N	N	N	N	high	middle	3	focal motor	annual	focal	NONE		NONE
53	M	N	N	N	Y	N	middle	high	2	NA	six-monthly	No	VPA	4	NONE
54	M	N	N	N	Y	N	high	middle	6	focal motor	six-monthly	No	NA		NONE
55	F	N	N	N	N	N	high	middle	2	focal with impaired awareness	annual	focal	NONE		NONE
56	M	N	N	N	N	Y	high	middle	2	focal to bilateral tonic–clonic	daily	No	NONE		NONE
57	F	N	Y preterm	N	N	N	NA	middle	2	focal motor	six-monthly	focal	NONE		NONE
58	M	N	N	N	N	N	middle	low	14	focal with impaired awareness	monthly	focal	NONE		NONE
59	F	N	N	N	N	N	middle	middle	4	focal with impaired awareness	six-monthly	No	LEV	4	NONE
60	M	N	N	N	N	N	middle	middle	3	focal motor	six-monthly	No	VPA	1	NONE
61	M	N	N	N	N	N	low	low	3	focal with impaired awareness	six-monthly	bilateral	OXC	4	Intellectual disability	language disorder, attention and memory deficit, aspecific learning disorder
62	F	Y	N	N	N	N	middle	low	4	focal with impaired awareness	six-monthly	focal	VPA	5	attention deficit	memory deficit
63	M	N	Y preterm	N	Y	N	middle	middle	1	focal motor	NA	No	VPA	4	specific learnind disability	memory deficit
64	M	Y	N	N	N	N	low	low	NA	focal to bilateral tonic–clonic	monthly	bilateral	LEV, VPA	9	specific learnind disability	attention deficit
65	M	N	N	N	Y	N	low	low	3	focal motor	annual	focal	NONE		language deficit	attention and memory deficit
66	M	Y	Y preterm	N	N	Y	low	middle	10	focal motor	monthly	bilateral	NONE		specific learning disability	dyslexia
67	M	N	N	N	Y	Y	low	low	20	focal motor	daily	focal	VPA	6	intellectual disability	language, attention and memory deficit, aspecific learning disorder
68	F	Y	N	N	N	N	middle	low	2	focal motor	annual	bilateral	NONE		language deficit	memory deficit
69	M	Y	N	N	Y	Y	low	middle	10	focal to bilateral tonic–clonic	annual	focal	NONE		autistic spectrum disorder	attention deficit, specific learning disorder
70	F	N	N	N	N	N	low	low	1	focal motor	annual	bilateral	NONE		intellectual disability	aspecific learning disorder, attention deficit
Summary of all the clinical characteristics of the study population.
ID 1–24 = retrospective study patients
ID 25–47 = perspective phone interview patients
ID 48–60 = perspective evaluated patients (typical neuropsychological profile)
ID 61–70 = perspective evaluated patients (atypical neuropsychological profile)
Abbreviations: Y = yes, N = no, NA = not available, AED = antiepileptic drugs. VPA = valproic acid, LEV = levetiracetam, OXC = oxcarbazepine, CLB = clobazam, TPM = topiramate, CBZ = carbamazepine.
